# Supplementary material for: Metal–organic framework-based nanoplatforms for synergistic anti-atherosclerosis therapy by regulating the PI3K/AKT/MSR1 pathway in macrophages
Source: Royal Society of Chemistry journal article supplement (doi:10.1039/d4nr04058a), 2024-12-20
Supplement: d4nr04058a1.pdf [file d4nr04058a1.pdf]

## Supplemental figures

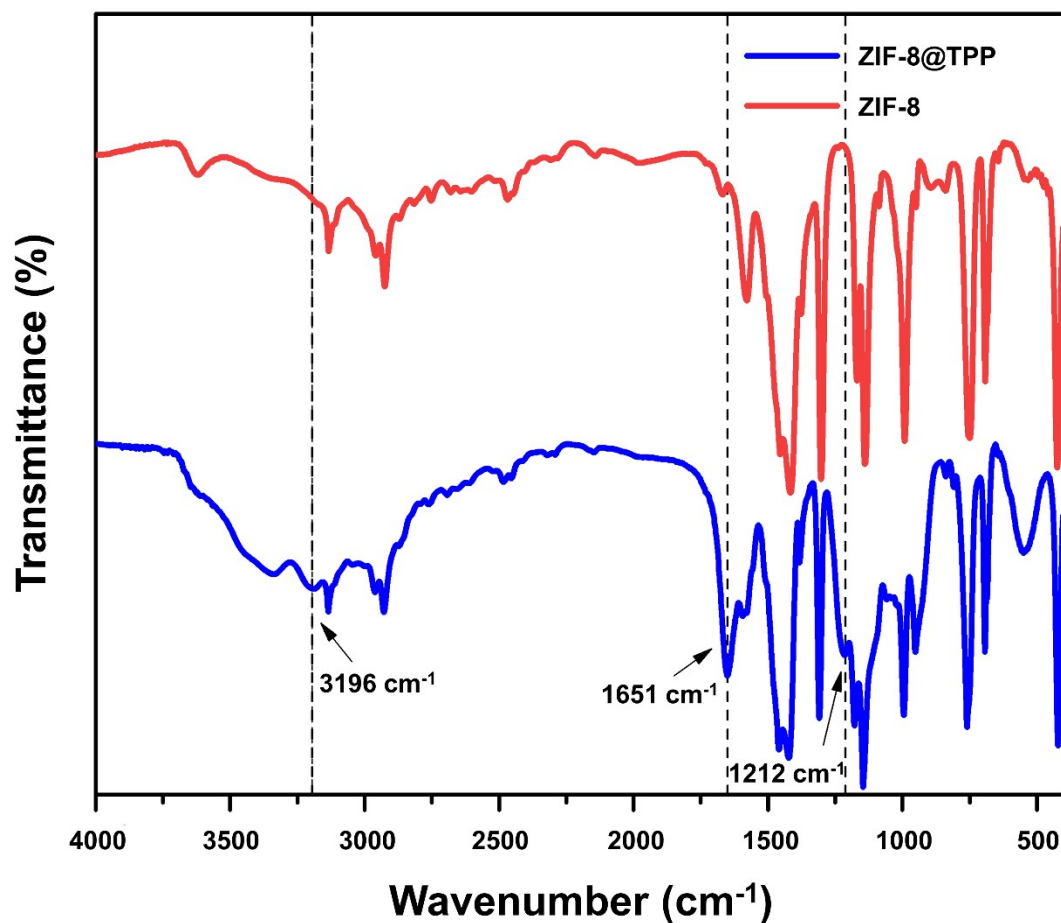

Figure S1. The FT-IR spectrum of ZIF-8 and ZIF-8@TPP.

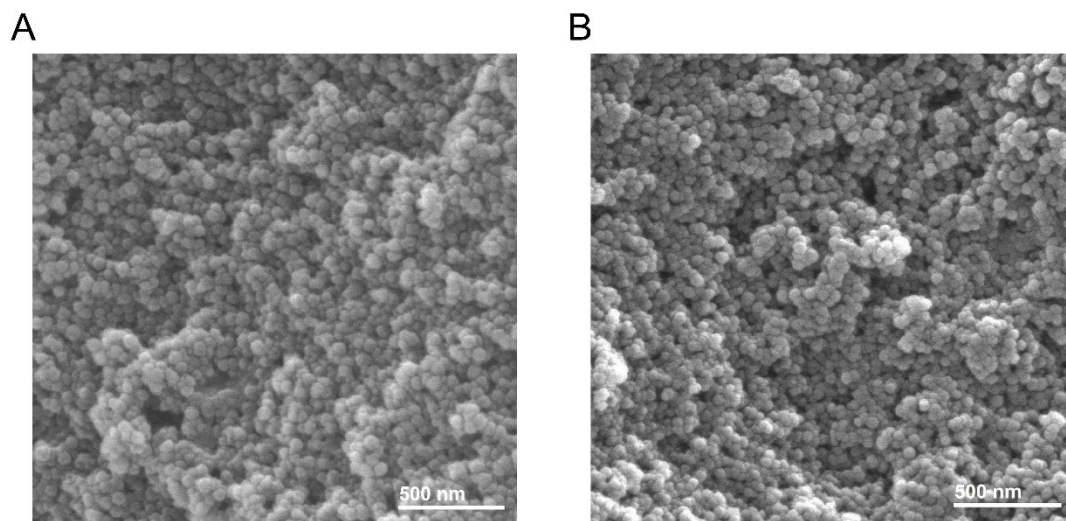

Figure S2. SEM images of (A) ZIF-8 and (B) ZIF-8@TPP.

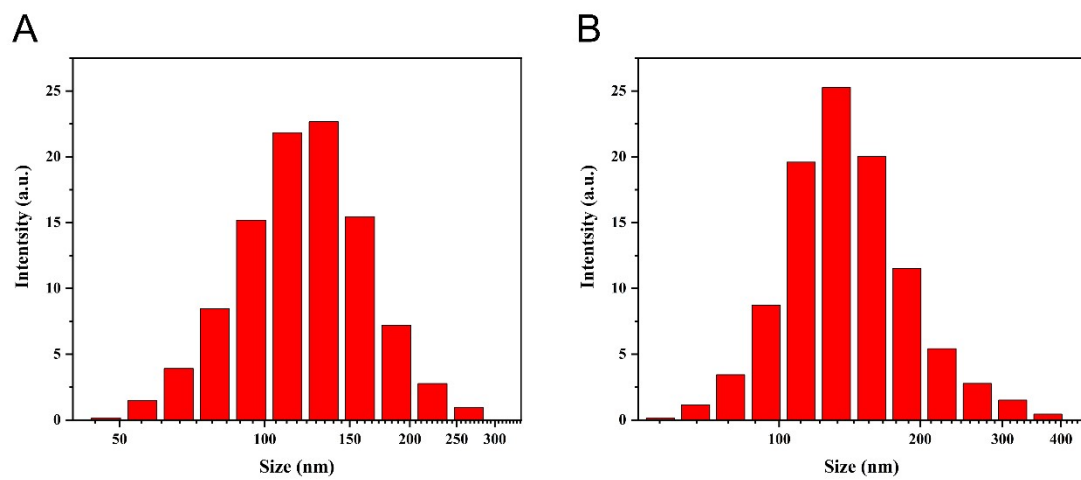

Figure S3. The particle size distribution of (A) ZIF-8, (B) ZIF-8@TPP.

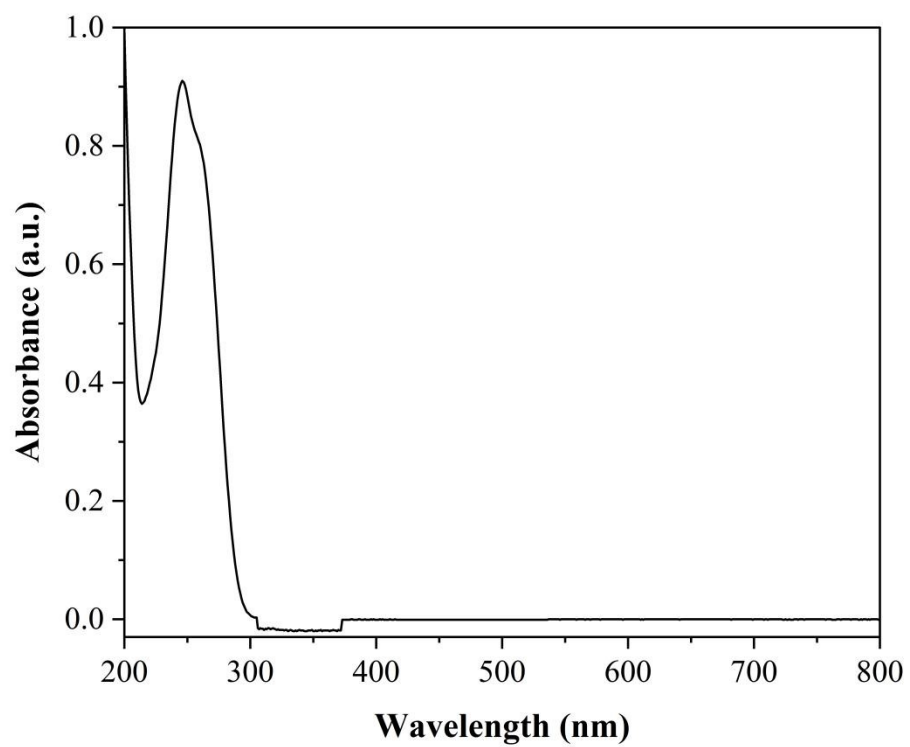

Figure S4. UV-Vis absorption spectra of TPP in DMSO/H<sub>2</sub>O<sub>2</sub> (1:1) solution.

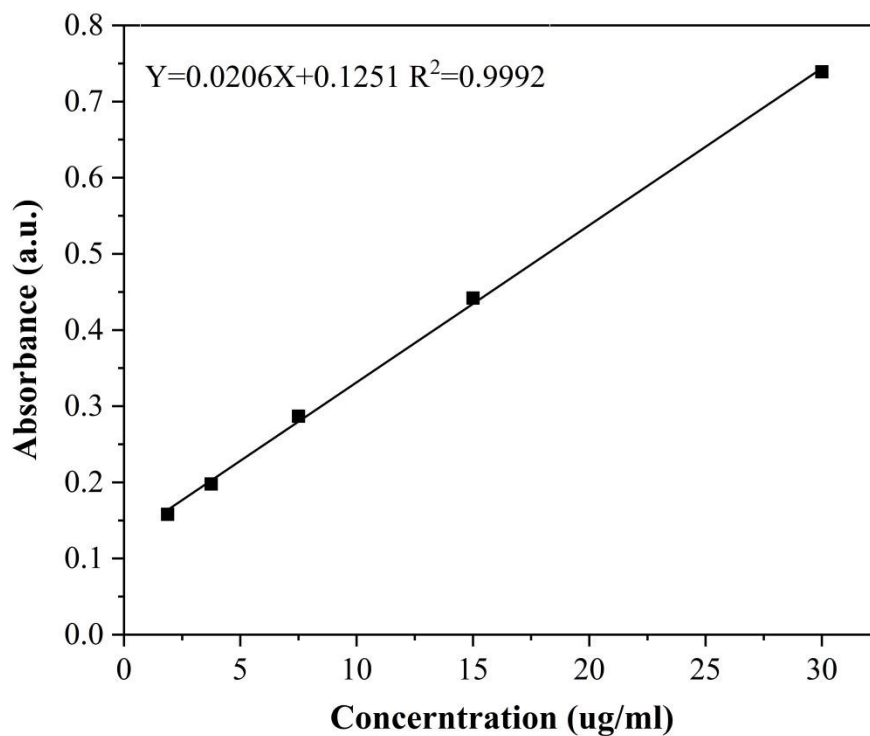

Figure S5. Standard working curve of TPP DMSO/H<sub>2</sub>O<sub>2</sub> (1:1) solution at 262 nm. The standard working curve of TPP in DMSO/H<sub>2</sub>O<sub>2</sub> (1:1) solution was  $y = 0.0206x + 0.1251$ ,  $R^2 = 0.9992$ , and it showed good linearity in the concentration of TPP solution of 1.875  $\mu\text{g/mL}$  to 30.0  $\mu\text{g/mL}$  with good linearity.

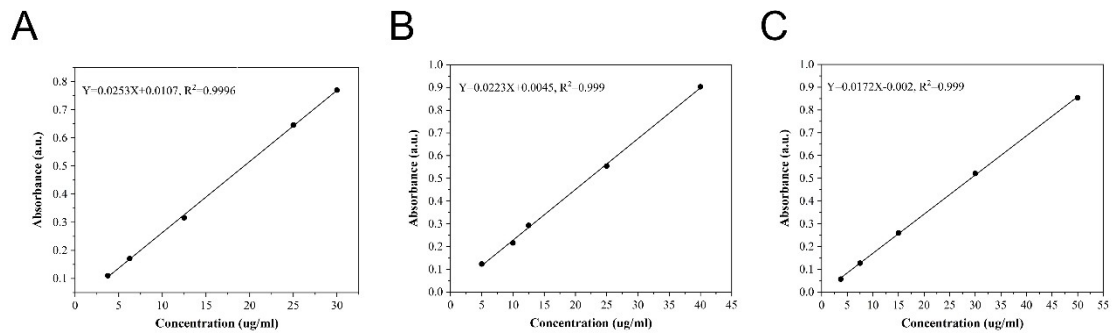

Figure S6. Standard working curves of TPP at (A) pH 5.4, (B) pH 6.4 and (C) pH 7.4.

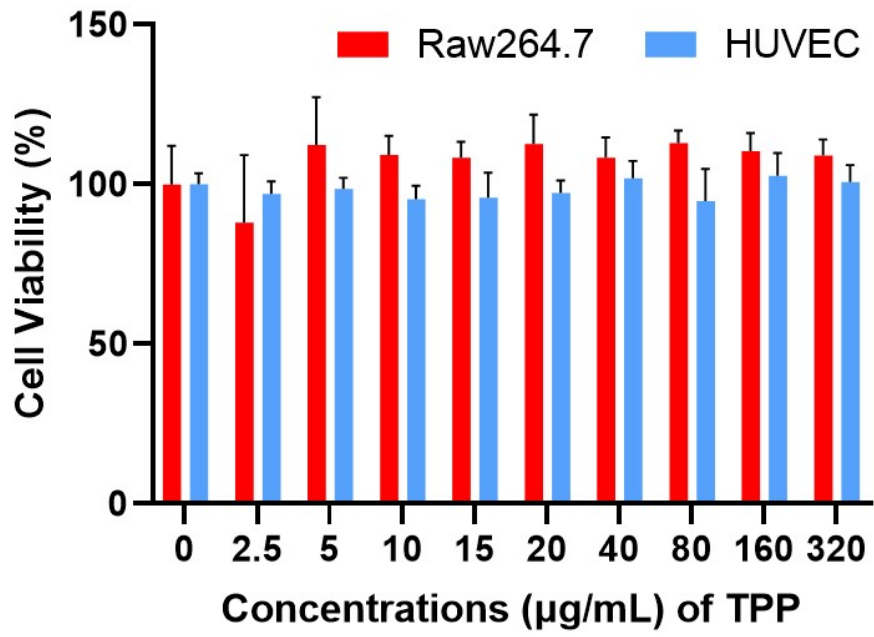

Figure S7. Cell viability of RAW264.7 cells and HUVECs treated with different concentrations of TPP for 24 hours.

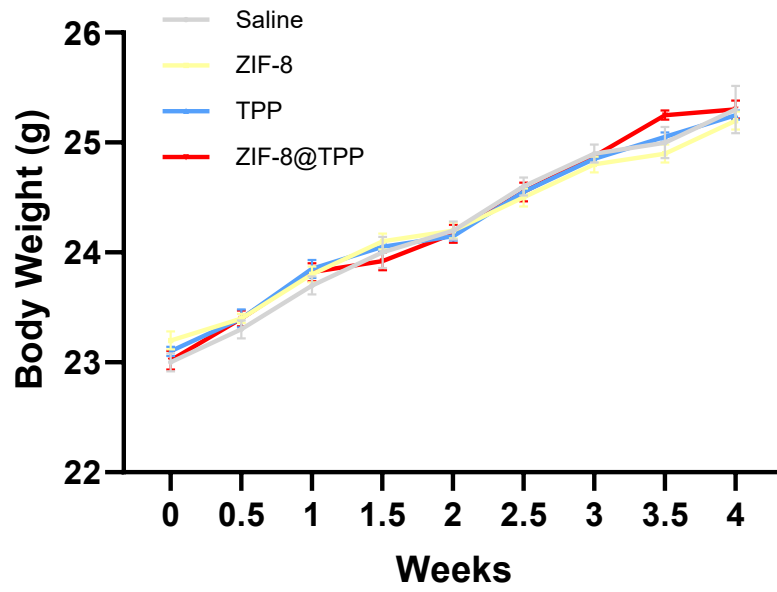

Figure S8. Body weights of mice in different groups at different timepoints after injected with different reagents.



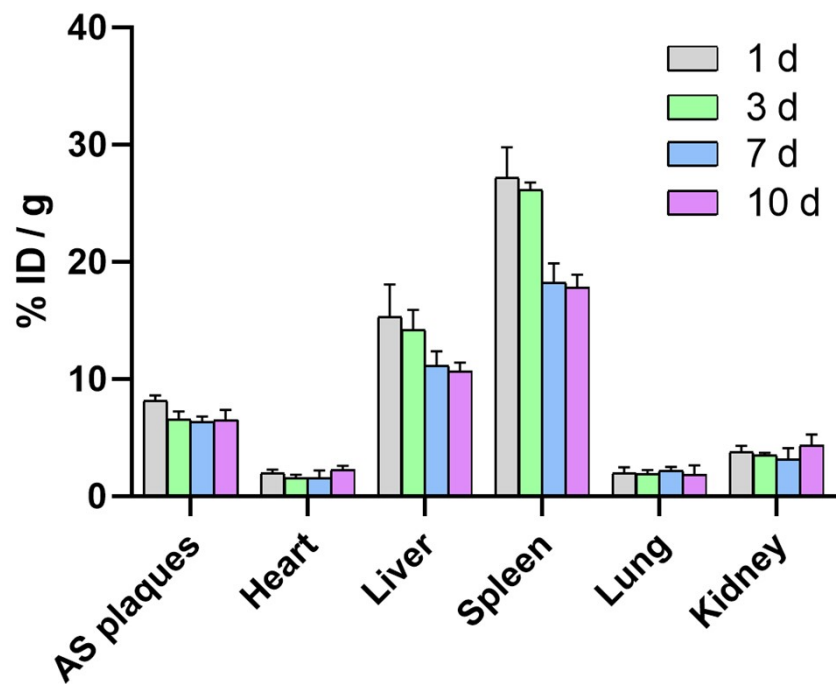

Figure S9. Biodistribution of ZIF-8@TPP determined by ICP-MS (n = 4) in atherosclerotic plaques and major organs. AS plaques = atherosclerotic plaques.
